# Supplementary material
Source: publisher site journal article supplement (http://www.degruyter.com/publication/journal_key/BYZS/downloadAsset/BYZS_Authorinformation_e.pdf)
Supplement: Supplementary file 1 [file BYZS_Authorinformation_e.pdf]

## Instructions for authors of the *Byzantinische Zeitschrift*

### Fonts

Please use only Unicode fonts.

### Title

Author's name with first and family name

Main title of the article

Subtitle

Additional indications (about plates ec.) in the language of the contribution

All this in upper and lower case like running text, not in capital letters

### Abstract in English

### Address

First and family name with academic titles, postal address; e-mail address

### Text

First lines after a title or subtitle, or of a paragraph break with a blank line before are not indented, while the following paragraphs are.

### Footnotes

Footnote numbers in the text always follow after the punctuation, except in case the footnote gives a reference to a single expression.

An unnumbered footnote at the beginning has the letter x as a reference (insert in Word: References > Footnotes > Symbols); the x will not appear in print.

### First quotation

### Monographs

Initial of first name (more than one separated by space) FAMILY NAME in small capitals, Title normal (not italics), dot. *Title of series* in italics, number, volume (if existent), dot. Place and year, if required quoted page, with comma before, but no indications such as "p". Abbreviation of series titles according to the list of sigla in the BZ, all other are given in full.

Example: D. R. REINSCH, Critobuli Imbriotae historiae. *CFHB*, 22. Berlin 1983, 57–88.

#### Articles in journals

Initial of first name (more than one separated by space) FAMILY NAME in small capitals, Title normal (not italics), dot. *Title of journal* in italics, number (year), page numbers. Abbreviations according to the list of sigla in the BZ – all other titles are given in full.

Example: B. GARSTAD, The account of Thoulis, king of Egypt, in the Chronographia of John Malalas. *BZ* 107 (2014), 51–76

#### Articles in volumes

Initial of first name (more than one separated by space) FAMILY NAME in small capitals, Title normal (not italics), comma, in initial of first name family name (not in small capitals), title – rest as monographs

Example: J. F. HALDON, Economy and administration, in M. Maas (ed.), *The Cambridge Companion to the Age of Justinian*. Cambridge 2005, 28–59.

#### Following quotations

FAMILY NAME in small capitals, title keyword and reference in brackets “as footnote x above”, followed by page numbers.

Example: MADDEN, Enrico Dandolo (as footnote 15 above), 57–88

#### Other

Author’s names, titles of series and journals and places of publication are always transcribed to Latin characters, titles remain in the original alphabet.

Several authors and places of publication are separated by / with space before and after.

Use n-dash between page numbers.

Zahlen (except ISBN in the bibliography) are separated by n-dashes, not by hyphens – example: 57–88, not 57-88

Elision only in groups of two numbers before and after the dash – example: 315–324, but 1267–68.

Plural duplications such as “pp.”, “ff.” usw. are not used.

These directions apply for other languages correspondingly. Please note the different use of quotation marks:

|         | double  | single  |
|---------|---------|---------|
| English | " ... " | ' ... ' |
| German  | „ ... ” | , ... ’ |
| French  | « ... » | < ... > |
| Italian | « ... » | ' ... ' |

Indices at ordinal numbers in English and French are not superscript – example:  
14th region, not 14<sup>th</sup> region.

### Transcription of Greek and Cyrillic alphabet

These scripts should be transcribed in English contributions in the following way:

| Griechisch |    | Kyrillisch                                             |    |
|------------|----|--------------------------------------------------------|----|
| β          | b  | в                                                      | v  |
| ζ          | z  | е, э, ъ                                                | je |
| η          | e  | ж                                                      | ž  |
| υ          | y  | з                                                      | z  |
| φ          | ph | ф                                                      | f  |
| αι         | ai | ц                                                      | c  |
| ει         | ei | ч                                                      | č  |
| οι         | oi | ш                                                      | š  |
| αυ         | au | щ                                                      | šč |
| ευ         | eu | ы                                                      | y  |
| ου         | ou | hard and soft Jer at the end of the word<br>is omitted |    |
